# Supplementary material for: Preclinical evaluation of strasseriolides A–D, potent antiplasmodial macrolides isolated from Strasseria geniculata CF-247,251
Source: Springer Nature journal article supplement (doi:10.1186/s12936-021-03993-8), 2021-12-01
Supplement: MOESM1 [file 19933414]

Additional information

1 **Preclinical evaluation of strasseriolides A-D, potent antiplasmodial macrolides**  
2 **isolated from *Strasseria geniculata* CF-247251**

3

4 Frederick Annang<sup>1, †</sup>, Guiomar Pérez-Moreno<sup>2, †</sup>, Caridad Díaz<sup>1</sup>, Victor González-  
5 Menéndez<sup>1</sup>, Nuria de Pedro Montejo<sup>1</sup>, José Pérez del Palacio<sup>1</sup>, Paula Sánchez<sup>2</sup>, Scott  
6 Tanghe<sup>3</sup>, Ana Rodríguez<sup>3</sup>, Ignacio Pérez-Victoria<sup>1</sup>, Juan Cantizani<sup>1</sup>, Luis M. Ruiz-Pérez<sup>2</sup>,  
7 Olga Genilloud<sup>1</sup>, Fernando Reyes<sup>1</sup>, Francisca Vicente<sup>1\*</sup>, Dolores González-  
8 Pacanowska<sup>1\*</sup>

9

10 <sup>1</sup>Fundación MEDINA, Avda. del Conocimiento 34, 18016, Armilla, Granada, Spain.

11 <sup>2</sup>Instituto de Parasitología y Biomedicina "López-Neyra", Consejo Superior de  
12 Investigaciones Científicas (CSIC) Avda. del Conocimiento 17, 18016, Armilla, Granada,  
13 Spain.

14 <sup>3</sup>Department of Microbiology, New York University School of Medicine, New York, NY  
15 10016, USA

16 \*[francisca.vicente@medinaandalucia.es](mailto:francisca.vicente@medinaandalucia.es)

17 \*[dgonzalez@ipb.csic.es](mailto:dgonzalez@ipb.csic.es)

18 <sup>†</sup>Equal contribution

19

20

21

22

23

## Additional information

### 24 **LC-MS method development for the quantification of compounds in mouse plasma**

25 The following LC-MS method was developed for the quantification and validation of  
26 strasseriolide **B** in mice plasma and was adapted for the quantification of strasseriolides  
27 **A, C, D**.

28

29 The mass spectrometer used in this experiment was operated in positive ion electrospray  
30 ionization (ESI) mode for strasseriolides **A** and **D** and in negative ion ESI mode for  
31 strasseriolide **B** and **C**. The LC-MS instrumentation used was composed of an API 4000  
32 mass spectrometer (Applied Biosystems/AB SCIEX, ThermoFisher Scientific, USA)  
33 coupled to an Agilent 1290 HPLC system (Agilent Technologies, USA) equipped with an  
34 analytical supelco C18 column of 2.1 x 50 mm, 5 µm and auto sampler CTC Pal-xt (CTC  
35 Analytics AG, Switzerland). Mobile phase A [90 % water/Acetonitrile (v/v) + 0.1 %  
36 formic acid], B [90 % Acetonitrile/water (v/v) + 0.1 % formic acid], rinse solution A  
37 [Acetonitrile: methanol: water (20: 40: 40) % v/v + 0.1 % formic acid], B (Water + 0.1%  
38 formic acid), and reconstitution solution [Water: acetonitrile (50:50) % v/v] were also  
39 used. Five microlitres (5 µL) sample injection and 0.6 mL/min flow rate were used with  
40 the following mobile phases B/A elution conditions: gradient maintained at 5% B from  
41 0.0-0.5 min, then increased linearly to 95% B from 0.5-2.10 min, maintained at 95% B  
42 from 2.10-3.20 min, lowered to 5% B from 3.20-3.30 min and later maintained at 95% B  
43 from 3.30-4.50 min to wash the column. The auto-sampler was set at 4 °C to rinse the  
44 injection system in between samples by using the rinsing solutions A and B respectively.

45

## Additional information

46 Ten millimolar (10 mM) DMSO stocks of the test compound, strasseriolide **B** (negative  
47  $m/z$  435 monitored) and internal standard, strasseriolide **C** (negative  $m/z$  449 monitored)  
48 were initially prepared, from which 9.94  $\mu\text{M}$  (4333 ng/mL) working concentrations were  
49 made in DMSO. An aliquot of the strasseriolide **B** working concentration was diluted  
50 (1:3) in DMSO to prepare a duplicate six-point calibration curve from 0.0016  $\mu\text{M}$  (0.7  
51 ng/mL) to 1.17  $\mu\text{M}$  (510 ng/mL). Four quality control concentrations of strasseriolide **B**  
52 at 1.18 (QC1), 0.294 (QC2), 0.0092 (QC3) and 0.00459  $\mu\text{M}$  (QC4) (i.e. 513, 128.0, 4.0  
53 and 2.0 ng/mL) were also prepared in duplicate.

54

55 Blank mouse plasma (prepared from non-injected mouse) was retrieved from the freezer  
56 (-80 °C) and kept on ice to thaw. The sample was vortexed and 15  $\mu\text{L}$  aliquots transferred  
57 into 0.7 mL Eppendorf tubes after which 35  $\mu\text{L}$  Milli-Q water were added and vortexed.  
58 Duplicate sets of the diluted plasma were then respectively spiked with 2  $\mu\text{L}$  of each  
59 concentration of the calibration curve. Another duplicate set of the diluted plasma was  
60 spiked with 2  $\mu\text{L}$  of each QC concentration. All the samples were also spiked with 2  $\mu\text{L}$   
61 internal standard (i.e. strasseriolide **C** at final concentration of 0.222  $\mu\text{M}$ ). Four  
62 microlitres (4  $\mu\text{L}$ ) DMSO were added to a set of six diluted plasma to serve as blanks.  
63 Two microlitres (2  $\mu\text{L}$ ) QC/internal standard (both at final conc of 0.222  $\mu\text{M}$ ) were added  
64 to 100  $\mu\text{L}$  aliquots of reconstitution solution to serve as non-matrix samples.

65

66 One hundred and sixty-two microlitres (162  $\mu\text{L}$ ) ice-cold acetonitrile was added to all the  
67 plasma-containing samples, centrifuged at 13300 rpm for 15 min at 4 °C. Aliquots of  
68 180  $\mu\text{L}$  were carefully transferred (without disturbing the protein precipitate) from each

## Additional information

69 tube into clean HPLC vials and evaporated to dryness in an EZ2 Genevac set at room  
70 temperature. The dried samples were re-dissolved in 40  $\mu$ L reconstitution solution by  
71 vortexing. The samples were placed in an auto-sampler mass spectrometer, subjected to  
72 LC-MS-MS and the resulting data analysed by Analyst<sup>®</sup> software version 1.5.2. A  
73 standard calibration curve was drawn by plotting the peak area ratio of test compound to  
74 internal standard against the concentrations of the calibration curve.

75

76 The following qualitative data were validated in this method development:

77 (1) Accurate metabolite identification – that the plasma ionic peak of strasseriolide **B**  
78 ( $m/z$  435 and retention time of 2.42 min) and that of the internal standard, strasseriolide **C**  
79 ( $m/z$  449 and retention time of 2.26 minutes) corresponded well with what is known for  
80 the pure compounds.

81 (2) Specificity - this was evaluated by the inclusion of six blank plasma samples (only  
82 spiked with DMSO), from which no significant interferences were observed at the  
83 retention times of the test compound and internal standard.

84 (3) Auto-sampler carryover was absent - implying that when samples are auto-injected  
85 into the LC-MS system in a pre-programmed sequence, there is no interference nor  
86 mixing between samples.

87 (4) Linearity of calibration curves - two independent standard calibration curves (0.0016  
88 to 1.17  $\mu$ M) of test compound (strasseriolide **B**), were prepared in mouse plasma and  
89 analyzed. The linearity of this curve was greater than 0.995 over the range of  
90 concentrations analyzed (**Fig. S1** and **Table S1**). The peak area ratio of test compound  
91 (strasseriolide **B**) to the internal standard (strasseriolide **C**), was correlated to the test

Additional information

92 compound concentration using the linear fit with  $1/X^2$  weighting (where X is  
93 concentration). All the standard calibration curve concentrations were recomputed from  
94 the curve plotted and were found to be of acceptable precision ( $CV \pm 20\%$ ) and accuracy  
95 ( $\pm 20\%$ ) when compared to the respective theoretical concentrations (**Table S1**) except  
96 for the lowest concentration of  $0.0016 \mu\text{M}$  which was not included in plotting the curve.  
97 Hence, the lower and upper concentration limits of the calibration curve were established  
98 at  $0.00484$  and  $1.18 \mu\text{M}$  respectively. The overall precision and accuracy of the  
99 developed method were determined using the three QC concentrations shown on **Table**  
100 **S2**.  
101

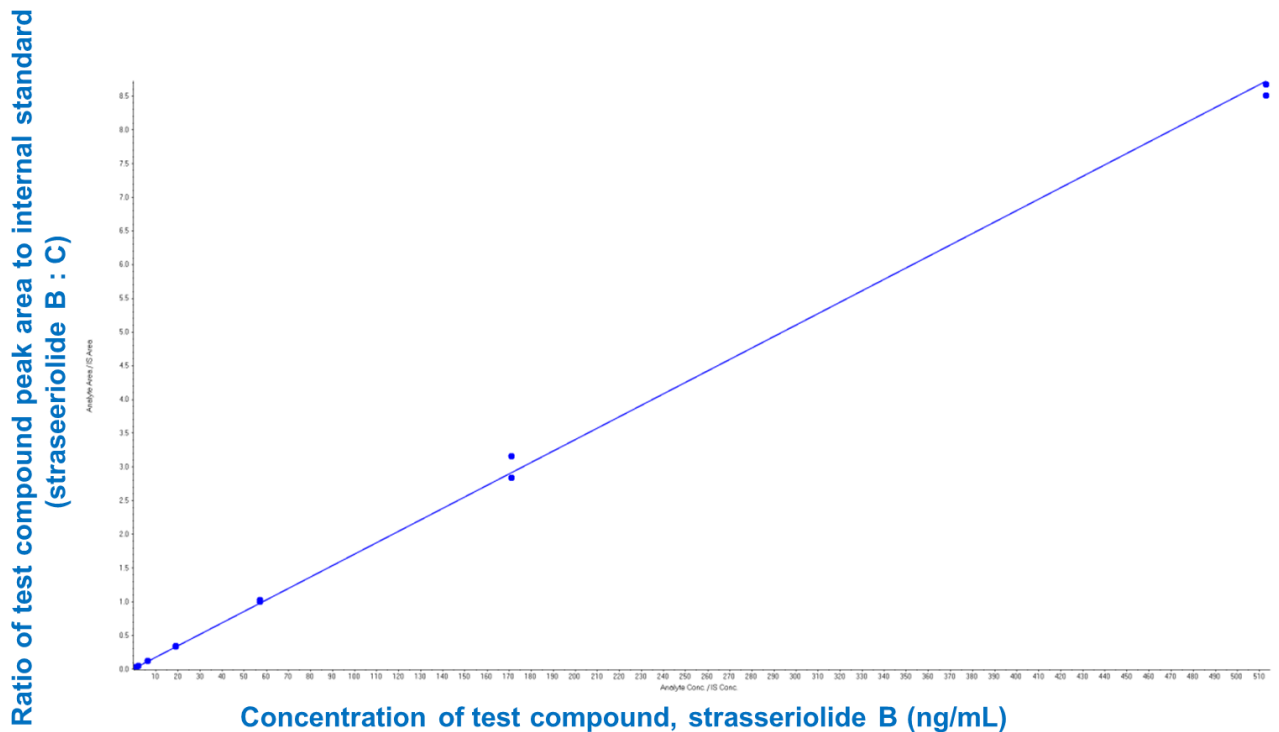

102

Additional information

103 **Fig. S1.** Calibration curve of test strasseriolide **B** (i.e. peak area ration of strasseriolide

104 **B:C** vs concentration of **B**)

105 The regression equation for the curve is:

106  $Y = 2.16 \times 10^{-2} + 0.0178X + 0.00594$  ( $r = 0.9997$ ), where X is the expected concentration

107 (**Table S1**) and Y is the peak area ratio of test compound (strasseriolide **B**) to the internal

108 standard (strasseriolide **C**).

109

110 **Table S1.** Calibration curve table of strasseriolide **B**.

| <b>Expected conc. in<br/>ng/mL (or <math>\mu</math>M)</b> | <b>No. of<br/>replicates</b> | <b>Experimental<br/>mean conc. in<br/>ng/mL (or <math>\mu</math>M)</b> | <b>%<br/>Accuracy</b> | <b>Std.<br/>deviation</b> | <b>% CV</b> |
|-----------------------------------------------------------|------------------------------|------------------------------------------------------------------------|-----------------------|---------------------------|-------------|
| 2.11 (0.00484)                                            | 2                            | 2.40 (0.00550)                                                         | 113.8                 | 0.04                      | 1.6         |
| 6.33 (0.0145)                                             | 2                            | 6.48 (0.0147)                                                          | 102.3                 | 0.05                      | 0.7         |
| 19 (0.0436)                                               | 2                            | 18.69 (0.0429)                                                         | 98.4                  | 0.25                      | 1.3         |
| 57 (0.131)                                                | 2                            | 56.85 (0.130)                                                          | 99.7                  | 0.84                      | 1.5         |
| 171 (0.392)                                               | 2                            | 171.12 (0.392)                                                         | 100.1                 | 13.28                     | 7.8         |
| 513 (1.177)                                               | 2                            | 512.99 (1.177)                                                         | 100.0                 | 7.28                      | 1.4         |
| 0.7 (0.0061)                                              | 1                            | 0.55 (0.00126)                                                         | 78.0                  | NA                        | NA          |

111

112

113

114

115

116 **Table S2.** QC table used to calculate the precision and accuracy of the method.

| <b>Compound</b> | <b>Expected<br/>conc. in<br/>ng/mL<br/>(or <math>\mu\text{M}</math>)</b> | <b>No.<br/>values</b> | <b>Experimental<br/>mean conc.<br/>in ng/mL<br/>(or <math>\mu\text{M}</math>)</b> | <b>STD<br/>deviation</b> | <b>%<br/>CV</b> | <b>%<br/>Accuracy</b> |
|-----------------|--------------------------------------------------------------------------|-----------------------|-----------------------------------------------------------------------------------|--------------------------|-----------------|-----------------------|
| <b>QC3</b>      | 4<br>(0.00917)                                                           | 5                     | 3.606<br>(0.00827)                                                                | 0.211                    | 5.84            | 90.162                |
| <b>QC2</b>      | 128<br>(0.294)                                                           | 5                     | 117.3<br>(0.269)                                                                  | 5.273                    | 4.49            | 91.686                |
| <b>QC1</b>      | 513<br>(1.177)                                                           | 5                     | 506.9<br>(1.163)                                                                  | 12.985                   | 2.56            | 98.817                |

117

118 (5) The mean recovery rate for the test compound (strasseriolide **B**) – this was calculated  
119 to be 29 % by comparing the plasma QC peak area ratios at the established retention time  
120 to peak area ratios of non-matrix samples at the same retention time.

121

122 Having validated the LC-MS method, it was used with some adjustments to quantify the  
123 mice plasma concentrations of strasseriolides **A-D** after intravenous dosage at 25 mg/kg  
124 as described in the methods section of the main text.

125

### 126 **Computing *in vivo* (mice) PK parameters of strasseriolides A-D**

127 After intravenous injection of mice with each of the test compounds and LC-MS

128 quantification of the compounds in the plasma at different time points (described in the

Additional information

129 main text), the data was fed into the *PK solver 2.0* add-in program in an Excel file with  
 130 “non-compartmental analysis of plasma data after intravenous bolus input” and from the  
 131 concentration vs time graph, the PK parameters of each compound were computed.

132

133 **Table S3a.** Strasseriolide A quantification in mouse plasma (i.v. dosage of 25 mg/kg)

| Sample Name             | Calc.<br>Conc.<br>(ng/ml) | Calc.<br>Conc.<br>( $\mu$ M)* | Ave.<br>Conc.<br>( $\mu$ M) | STD<br>deviation | Analyte<br>RT<br>(min) |
|-------------------------|---------------------------|-------------------------------|-----------------------------|------------------|------------------------|
| T 24 h (1440 minutes) 1 | <2.1                      | <0.00484                      |                             |                  | 2.52                   |
| T 24 h (1440 minutes) 2 | <2.1                      | <0.00484                      | <0.00484                    | 0                | 2.43                   |
| T 24 h (1440 minutes) 3 | <2.1                      | <0.00484                      |                             |                  | 2.82                   |
| T 6 h (360 minutes) 1   | 3.19                      | 0.00735                       |                             |                  | 2.61                   |
| T 6 h (360 minutes) 2   | 2.53                      | 0.00583                       | 0.01156                     | 0.0086           | 2.61                   |
| T 6 h (360 minutes) 3   | 9.33                      | 0.02150                       |                             |                  | 2.61                   |
| T 2 h (120 minutes) 1   | 43.7                      | 0.1007                        |                             |                  | 2.62                   |
| T 2 h (120 minutes) 2   | 55.0                      | 0.1267                        | 0.0935                      | 0.0374           | 2.61                   |
| T 2 h (120 minutes) 3   | 23.0                      | 0.0530                        |                             |                  | 2.61                   |
| T 0.5 h (30 minutes) 1  | 343.0                     | 0.790                         |                             |                  | 2.62                   |
| T 0.5 h (30 minutes) 2  | 214.0                     | 0.493                         | 0.498                       | 0.290            | 2.61                   |
| T 0.5 h (30 minutes) 3  | 91.6                      | 0.2111                        |                             |                  | 2.61                   |

134 \*Molecular weight of strasseriolide A = 434 g/mol

135

136



Additional information

137 **Table S3b.** Non-compartmental analysis of strasseriolide **A** in mouse plasma (after i.v.  
 138 bolus input)

| Parameter         | Unit                                             | Value                       |
|-------------------|--------------------------------------------------|-----------------------------|
| Lambda_z          | 1/h                                              | 0.157078075                 |
| t1/2*             | h                                                | 4.412755773                 |
| Tmax*             | h                                                | 0.5                         |
| Cmax*             | ng/ml (or µM)                                    | 216.2 (or 0.498)            |
| C0*               | ng/ml (or µM)                                    | 377.5422633 (or 0.870)      |
| Clast_obs/Cmax    |                                                  | 0.009713228                 |
| AUC 0-t           | ng/ml x h (or µM x h)                            | 496.1355658 (or 1.143)      |
| AUC 0-inf_obs     | ng/ml x h (or µM x h)                            | 509.5047136 (or 1.174)      |
| AUC 0-t/0-inf_obs |                                                  | 0.973760502                 |
| AUMC 0-inf_obs    | ng/ml x h <sup>2</sup> (or µM x h <sup>2</sup> ) | 1520.971031 (or 3.505)      |
| MRT 0-inf_obs     | h                                                | 2.98519521                  |
| Vz_obs            | (mg/kg)/(ng/ml)                                  | 0.312374974 (or 312.4 L/kg) |
| Cl_obs            | (mg/kg)/(ng/ml)/h                                | 0.049067259                 |
| Vss_obs           | (mg/kg)/(ng/ml)                                  | 0.146475348                 |

139 \* The parameters Cmax, C0 and Tmax obtained may not be the accurate values since  
 140 blood samples were not collected at time T0 (or at times close enough to T0) in our  
 141 experiment.

142

Additional information

- 143 •  $\lambda_z$  (Lambda-z) – Individual estimate of the terminal elimination rate constant,  
 144 calculated using log-linear regression of the terminal portions of the plasma  
 145 concentration-versus-time curves.
- 146 •  $t_{1/2}$  – Apparent terminal elimination half-life time, defined as  $0.693 / \lambda_z$
- 147 • C-max – Maximum concentration achieved
- 148 • T-max – Time to reach maximum concentration
- 149 • AUC<sub>0-t</sub> – The area under the concentration vs. time curve, calculated as sum of  
 150 AUCs using linear trapezoidal summation from time 0 to the last measurable data  
 151 point
- 152 • AUC<sub>0-inf</sub> – The area under the plasma concentration-time curve extrapolated to  
 153 infinity, calculated as:  $AUC_{0-inf} = AUC_{0-t} + C_{last} / \lambda_z$ , where  $C_{last}$  is the last  
 154 measurable concentration.
- 155 • MRT – Mean retention time
- 156 •  $V_{ss}$  – Steady state volume
- 157 •  $V_{z\_obs}$  – Plasma distribution volume
- 158 • Cl – Clearance

159

160 **Table S4.** Strasseriolide **B** quantification in mouse plasma (i.v. dosage of 25 mg/kg)

| Sample Name     | Calc.<br>Conc.<br>(ng/ml) | Calc.<br>Conc.<br>( $\mu$ M)* | Ave.<br>Conc.<br>( $\mu$ M) | STD<br>deviation | Analyte<br>RT (min) |
|-----------------|---------------------------|-------------------------------|-----------------------------|------------------|---------------------|
| T 8 minutes 1** | 8110.0                    | 18.6                          |                             |                  | 2.39                |
| T 8 minutes 2** | 9098.0                    | 20.9                          | 19.6                        | 1.2              | 2.39                |

Additional information

| Sample Name     | Calc.<br>Conc.<br>(ng/ml) | Calc.<br>Conc.<br>( $\mu$ M)* | Ave.<br>Conc.<br>( $\mu$ M) | STD<br>deviation | Analyte<br>RT (min) |
|-----------------|---------------------------|-------------------------------|-----------------------------|------------------|---------------------|
| T 8 minutes 3** | 8419.0                    | 19.3                          |                             |                  | 2.39                |

161 \*Molecular weight of strasseriolide **B** = 436 g/mol

162 \*\*All the three mice died about eight minutes after injection with the compound

163

164 **S5a.** Strasseriolide **C** quantification in mouse plasma (i.v. dosage of 25 mg/Kg)

| Sample Name             | Calc.<br>Conc.<br>(ng/ml) | Calc.<br>Conc.<br>( $\mu$ M)* | Ave.<br>Conc.<br>( $\mu$ M) | STD<br>deviation | Analyte<br>RT (min) |
|-------------------------|---------------------------|-------------------------------|-----------------------------|------------------|---------------------|
| T 24 h (1440 minutes) 1 | 2.04                      | 0.00453                       | 0.00354                     | 0.00089          | 2.12                |
| T 24 h (1440 minutes) 2 | 1.27                      | 0.00282                       |                             |                  | 2.12                |
| T 24 h (1440 minutes) 3 | 1.47                      | 0.00327                       |                             |                  | 2.12                |
| T 6 h (360 minutes) 1   | 10.4                      | 0.0231                        | 0.024                       | 0.0012           | 2.12                |
| T 6 h (360 minutes) 2   | 10.6                      | 0.0236                        |                             |                  | 2.12                |
| T 6 h (360 minutes) 3   | 11.4                      | 0.0253                        |                             |                  | 2.12                |
| T 2 h (120 minutes) 1   | 20.7                      | 0.046                         | 0.040                       | 0.009            | 2.12                |
| T 2 h (120 minutes) 2   | 19.8                      | 0.044                         |                             |                  | 2.12                |
| T 2 h (120 minutes) 3   | 13.6                      | 0.030                         |                             |                  | 2.12                |
| T 30 minutes 1          | 122.0                     | 0.271                         | 0.246                       | 0.023            | 2.12                |
| T 30 minutes 2          | 102.0                     | 0.227                         |                             |                  | 2.12                |

Additional information

| Sample Name    | Calc.<br>Conc.<br>(ng/ml) | Calc.<br>Conc.<br>( $\mu$ M)* | Ave.<br>Conc.<br>( $\mu$ M) | STD<br>deviation | Analyte<br>RT (min) |
|----------------|---------------------------|-------------------------------|-----------------------------|------------------|---------------------|
| T 30 minutes 3 | 108.0                     | 0.240                         |                             |                  | 2.12                |

165 \*Molecular weight of strasseriolide C = 450 g/mol

166

167 **Table S5b.** Non-compartmental analysis of strasseriolide C in mouse plasma (after i.v.

168 bolus input)

| Parameter         | Unit                                                  | Value                       |
|-------------------|-------------------------------------------------------|-----------------------------|
| Lambda_z          | 1/h                                                   | 0.109293684                 |
| t1/2*             | h                                                     | 6.342060722                 |
| Tmax*             | h                                                     | 0.5                         |
| Cmax*             | ng/ml (or $\mu$ M)                                    | 110.67 (or 0.246)           |
| C0*               | ng/ml (or $\mu$ M)                                    | 203.1753953 (or 0.452)      |
| Clast_obs/Cmax    |                                                       | 0.014324324                 |
| AUC 0-t           | ng/ml x h (or $\mu$ M x h)                            | 344.6788488 (or 0.766)      |
| AUC 0-inf_obs     | ng/ml x h (or $\mu$ M x h)                            | 359.2268075 (or 0.798)      |
| AUC 0-t/0-inf_obs |                                                       | 0.959502024                 |
| AUMC 0-inf_obs    | ng/ml x h <sup>2</sup> (or $\mu$ M x h <sup>2</sup> ) | 1693.549878 (or 3.763)      |
| MRT 0-inf_obs     | h                                                     | 4.714430667                 |
| Vz_obs            | (mg/kg)/(ng/ml)                                       | 0.636760632 (or 636.8 L/kg) |
| Cl_obs            | (mg/kg)/(ng/ml)/h                                     | 0.069593915                 |

Additional information

V<sub>ss\_obs</sub> (mg/kg)/(ng/ml) 0.328095688

169 \* The parameters C<sub>max</sub>, C<sub>0</sub> and T<sub>max</sub> obtained may not be the accurate values since  
 170 blood samples were not collected at time T<sub>0</sub> (or at times close enough to T<sub>0</sub>) in our  
 171 experiment.

172

173 **Table S6a.** Strasseriolide **D** quantification in mouse plasma (i.v. dosage of 25 mg/Kg)

| Sample Name             | Calc. Conc. (ng/ml) | Calc. Conc. (μM)* | Ave. Conc. (μM) | STD deviation | Analyte RT |
|-------------------------|---------------------|-------------------|-----------------|---------------|------------|
| T 24 h (1440 minutes) 1 | 49.2                | 0.109             | 0.107           | 0.005         | 2.08       |
| T 24 h (1440 minutes) 2 | 49.9                | 0.110             |                 |               | 2.08       |
| T 24 h (1440 minutes) 3 | 46.1                | 0.102             |                 |               | 2.08       |
| T 5 h (300 minutes) 1   | 195.0               | 0.431             | 0.389           | 0.037         | 2.08       |
| T 5 h (300 minutes) 2   | 164.0               | 0.363             |                 |               | 2.08       |
| T 5 h (300 minutes) 3   | 168.0               | 0.372             |                 |               | 2.08       |
| T 1.5 h (90 minutes) 1  | 307.0               | 0.679             | 1.247           | 0.497         | 2.08       |
| T 1.5 h (90 minutes) 2  | 658.0               | 1.456             |                 |               | 2.08       |
| T 1.5 h (90 minutes) 3  | 726.0               | 1.606             |                 |               | 2.08       |

174 \*Molecular weight of strasseriolide **D** = 452 g/mol

175

176

177

Additional information

178 **Table S6b.** Non-compartmental analysis of strasseriolide **D** in mouse plasma (after i.v.  
 179 bolus input)

| Parameter         | Unit                                          | Value                      |
|-------------------|-----------------------------------------------|----------------------------|
| Lambda_z          | 1/h                                           | 0.09534357                 |
| t1/2*             | h                                             | 7.269993954                |
| Tmax*             | h                                             | 1.5                        |
| Cmax*             | ng/ml (or µM)                                 | 564 (or 1.247)             |
| C0*               | ng/ml (or µM)                                 | 929.0437116 (or 2.055)     |
| Clast_obs/Cmax    |                                               | 0.085815603                |
| AUC 0-t           | ng/ml x h (or µM x h)                         | 4546.582784 (or 10.06)     |
| AUC 0-inf_obs     | ng/ml x h (µM x h)                            | 5054.22058 (or 11.18)      |
| AUC 0-t/0-inf_obs |                                               | 0.899561606                |
| AUMC 0-inf_obs    | ng/ml x h <sup>2</sup> (µM x h <sup>2</sup> ) | 40557.80737 (or 89.73)     |
| MRT 0-inf_obs     | h                                             | 8.024542405                |
| Vz_obs            | (mg/kg)/(ng/ml)                               | 0.051879336 (or 51.9 L/kg) |
| Cl_obs            | (mg/kg)/(ng/ml)/h                             | 0.004946361                |
| Vss_obs           | (mg/kg)/(ng/ml)                               | 0.039692284                |

180 \* The parameters Cmax, C0 and Tmax obtained may not be the accurate values since  
 181 blood samples were not collected at time T0 (or at times close enough to T0) in our  
 182 experiment.

183

184

185

186 **Calculation of theoretical C<sub>max</sub> achievable with 25 mg/kg drug dosage in mice**

187 For purpose of comparison with the experimental C<sub>max</sub> values, the theoretical C<sub>max</sub>  
 188 achievable with the drug dosage of 25 mg/kg (0.5 mg drug in 200 µL vehicle vehicle)  
 189 was calculated with two key ideal-situation assumptions: (i) total mouse plasma volume  
 190 is estimated in the literature to be 1.8 mL (1), (ii) that theoretically all the compounds are  
 191 totally soluble in the vehicle as well as the whole mouse plasma volume. From the above  
 192 assumptions, the theoretical maximum concentration (theoretical C<sub>max</sub>) achievable in the  
 193 mouse plasma could be calculated as 0.5 mg/2 mL (i.e 1.8 mL plasma + 0.2 mL vehicle).  
 194 This concentration is equivalent to 250000 ng/mL or 250000 ppb (i.e. between 553-573  
 195 µM for all the four compounds).

196

197 **Table S7.** *In vivo* mice efficacy data of strasseriolide **C** at i.p. dosage of 50 mg/kg

|                         | <b>Parasitaemia</b> (Luminescence arbitrary units) |                        |                        |                        |                                                 |
|-------------------------|----------------------------------------------------|------------------------|------------------------|------------------------|-------------------------------------------------|
|                         | Replicate 1                                        | Replicate 2            | Replicate 3            | Replicate 4            | Average ± SD                                    |
| Vehicle only            | 2.90 x 10 <sup>6</sup>                             | 1.20 x 10 <sup>7</sup> | 2.39 x 10 <sup>6</sup> | 5.57 x 10 <sup>6</sup> | 5.72 x 10 <sup>6</sup> ± 4.43 x 10 <sup>6</sup> |
| Strasseriolide <b>C</b> | 6.98 x 10 <sup>6</sup>                             | 2.22 x 10 <sup>6</sup> | 2.90 x 10 <sup>6</sup> | 2.55 x 10 <sup>6</sup> | 3.66 x 10 <sup>6</sup> ± 2.23 x 10 <sup>6</sup> |
| Chloroquine             | 0.00                                               | 0.00                   | 0.00                   | 0.00                   | 0.00                                            |

198

199

200

201

202

203 **Table S8.** *In vivo* mice efficacy ta daof strasseriolide **D** at i.p. dosage of 22 mg/kg

|                         | <b>Parasitaemia</b> (Luminescence arbitrary units) |                    |                    |                    |                    |                                               |
|-------------------------|----------------------------------------------------|--------------------|--------------------|--------------------|--------------------|-----------------------------------------------|
|                         | Replicate 1                                        | Replicate 2        | Replicate 3        | Replicate 4        | Replicate 5        | Average $\pm$ SD                              |
| Vehicle only            | $7.81 \times 10^5$                                 | $7.45 \times 10^5$ | $6.06 \times 10^5$ | $4.02 \times 10^4$ | $3.64 \times 10^5$ | $5.07 \times 10^5 \pm 3.08$<br>$\times 10^5$  |
| Strasseriolide <b>D</b> | $2.46 \times 10^5$                                 | $1.59 \times 10^5$ | $1.88 \times 10^5$ | $2.56 \times 10^4$ | $6.93 \times 10^3$ | $1.25 \times 10^5 \pm 1.04$<br>$\times 10^5$  |
| Chloroquine             | $3.86 \times 10^3$                                 | $2.17 \times 10^3$ | $2.63 \times 10^3$ | $3.38 \times 10^3$ | -                  | $3.01 \times 10^3 \pm$<br>$0.755 \times 10^3$ |

204

205 **References**

- 206 1. Riches, A. C., Sharp, J. G., Thomas, D. B., Smith, S. V.: Blood volume  
207 determination in the mouse. *J Phygiol* **228**, 279-284 (1973)
